# Supplementary material for: The yield difference between wild-type cotton and transgenic cotton that expresses IPT depends on when water-deficit stress is applied
Source: PubMed Central journal article supplement (PMC5803251; doi:10.1038/s41598-018-20944-7), 2018-02-07
Supplement: 41598_2018_20944_MOESM1_ESM.pdf [file 41598_2018_20944_MOESM1_ESM.pdf]

## Supplemental Materials

### **The yield difference between wild-type cotton and transgenic cotton that expresses *IPT* depends on when water-deficit stress is applied**

Xunlu Zhu<sup>1,6</sup>, Li Sun<sup>1,6</sup>, Sundaram Kuppu<sup>1,6</sup>, Rongbin Hu<sup>1</sup>, Neelam Mishra<sup>1</sup>, Jennifer Smith<sup>1</sup>, Nardana Esmaeili<sup>1</sup>, Maheshika Herath<sup>1</sup>, Michael A. Gore<sup>2,5</sup>, Paxton Payton<sup>3,\*</sup>, Guoxin Shen<sup>4,\*</sup>, Hong Zhang<sup>1,\*</sup>

<sup>1</sup> Department of Biological Sciences, Texas Tech University, Lubbock, TX 79409, USA

<sup>2</sup> USDA-ARS, Arid-Land Agricultural Research Center, Maricopa, AZ 85239, USA

<sup>3</sup> USDA-ARS, Cropping Systems Research Laboratory, Lubbock, TX 79415, USA

<sup>4</sup> Zhejiang Academy of Agricultural Sciences, Hangzhou, Zhejiang Province, China

<sup>5</sup> Current address: Plant Breeding and Genetics Section, School of Integrative Plant Science, Cornell University, Ithaca, NY 14853, USA

<sup>6</sup> Co-first authors

\*Co-corresponding author: Hong Zhang (phone: 806-834-1579; fax: 806-742-2963; e-mail, [hong.zhang@ttu.edu](mailto:hong.zhang@ttu.edu)); Paxton Payton ([paxton.payton@ars.usda.gov](mailto:paxton.payton@ars.usda.gov)); Guoxin Shen (e-mail: [guoxin.shen@gmail.com](mailto:guoxin.shen@gmail.com)).

## Supplemental Tables

**Table 1.** Average monthly high and low temperatures and total precipitation for Lubbock, TX, USA in 2010 and 2011. Source: National Weather Service Weather Forecast Office, Lubbock, TX (<http://www.srh.noaa.gov/lub>).

### *Year 2010*

| <b>Lubbock</b> | <b>Average High<br/>Temperature (°C)</b> | <b>Average Low<br/>Temperature (°C)</b> | <b>Precipitation<br/>(cm)</b> |
|----------------|------------------------------------------|-----------------------------------------|-------------------------------|
| January        | 11.78                                    | -3.37                                   | 3.58                          |
| February       | 9.89                                     | -1.83                                   | 4.52                          |
| March          | 18.83                                    | 2.61                                    | 7.24                          |
| April          | 23.11                                    | 9.06                                    | 11.81                         |
| May            | 28.06                                    | 13.61                                   | 2.90                          |
| June           | 34.39                                    | 20.00                                   | 6.48                          |
| July           | 30.28                                    | 20.11                                   | 18.14                         |
| August         | 34.00                                    | 19.61                                   | 3.38                          |
| September      | 31.06                                    | 16.56                                   | 2.36                          |
| October        | 26.33                                    | 8.83                                    | 6.63                          |
| November       | 19.39                                    | 1.50                                    | 0.18                          |
| December       | 15.89                                    | -1.00                                   | 0.00                          |
| <b>Annual</b>  |                                          |                                         | <b>67.22</b>                  |

### *Year 2011*

| <b>Lubbock</b> | <b>Average High<br/>Temperature (°C)</b> | <b>Average Low<br/>Temperature (°C)</b> | <b>Precipitation<br/>(cm)</b> |
|----------------|------------------------------------------|-----------------------------------------|-------------------------------|
| January        | 13.89                                    | 4.44                                    | 0.15                          |
| February       | 14.44                                    | -3.89                                   | 1.09                          |
| March          | 22.78                                    | 3.33                                    | 0.89                          |
| April          | 36.11                                    | 16.66                                   | 0.00                          |
| May            | 30.56                                    | 12.77                                   | 0.66                          |
| June           | 38.33                                    | 21.66                                   | 0.00                          |
| July           | 37.22                                    | 22.77                                   | 0.13                          |
| August         | 37.22                                    | 22.77                                   | 0.86                          |
| September      | 30.00                                    | 13.88                                   | 3.18                          |
| October        | 25.00                                    | 8.88                                    | 3.40                          |
| November       | 17.78                                    | 10.55                                   | 0.66                          |
| December       | 7.78                                     | 2.77                                    | 3.86                          |
| <b>Annual</b>  |                                          |                                         | <b>14.88</b>                  |

**Table 2.** Average monthly high and low temperatures and total precipitation for Phoenix, Arizona, USA in 2011. Source: National Weather Service Weather Forecast Office, Phoenix, AZ (<http://w2.weather.gov/climate/xmacis.php?wfo=psr>).

| <i>Year 2011</i> |                                          |                                         |                               |
|------------------|------------------------------------------|-----------------------------------------|-------------------------------|
| <b>Phoenix</b>   | <b>Average High<br/>Temperature (°C)</b> | <b>Average Low<br/>Temperature (°C)</b> | <b>Precipitation<br/>(cm)</b> |
| January          | 24.4                                     | -1.1                                    | 0.10                          |
| February         | 27.2                                     | -1.1                                    | 1.67                          |
| March            | 33.8                                     | 8.3                                     | 0.15                          |
| April            | 37.7                                     | 6.6                                     | 0.68                          |
| May              | 38.3                                     | 12.7                                    | 0.02                          |
| June             | 46.1                                     | 18.8                                    | 0.00                          |
| July             | 47.7                                     | 23.3                                    | 3.58                          |
| August           | 47.2                                     | 27.2                                    | 0.43                          |
| September        | 44.4                                     | 22.2                                    | 0.05                          |
| October          | 37.7                                     | 13.8                                    | 0.28                          |
| November         | 31.1                                     | 7.2                                     | 2.05                          |
| December         | 23.8                                     | 2.2                                     | 2.79                          |
| <b>Annual</b>    |                                          |                                         | <b>11.83</b>                  |
